# Supplementary material for: Selective binding of oxalate by a tris-ureido calix[6]tube in a protic environment
Source: Royal Society of Chemistry journal article supplement (doi:10.1039/d3ob00947e), 2023-01-01
Supplement: d3ob00947e1.pdf [file d3ob00947e1.pdf]

## Supplementary Information

### Selective binding of oxalate by a tris-ureido calix[6]tube in a protic environment

*Roy Lavendomme, Steven Moerkerke, Gaëlle Mariaule, and Ivan Jabin\**

Université libre de Bruxelles (ULB), Laboratoire de Chimie Organique, Avenue F.D. Roosevelt  
50, CP160/06, B-1050 Brussels, Belgium.

Corresponding Author: [Ivan.Jabin@ulb.be](mailto:Ivan.Jabin@ulb.be)

#### Table of Contents

|                                             |           |
|---------------------------------------------|-----------|
| <b>1. NMR spectra of new compounds.....</b> | <b>2</b>  |
| 1.1. Calixarene <b>2</b> .....              | 2         |
| 1.2. Calixarene <b>3</b> .....              | 5         |
| 1.3. Calixarene <b>C6U</b> .....            | 8         |
| <b>2. Binding studies .....</b>             | <b>9</b>  |
| 2.1. Binding studies with <b>C3U</b> .....  | 9         |
| 2.2. Binding studies with <b>C3TU</b> ..... | 12        |
| 2.3. Binding studies with <b>C6U</b> .....  | 14        |
| <b>3. Molecular modeling .....</b>          | <b>15</b> |

# 1. NMR spectra of new compounds

## 1.1. Calixarene 2

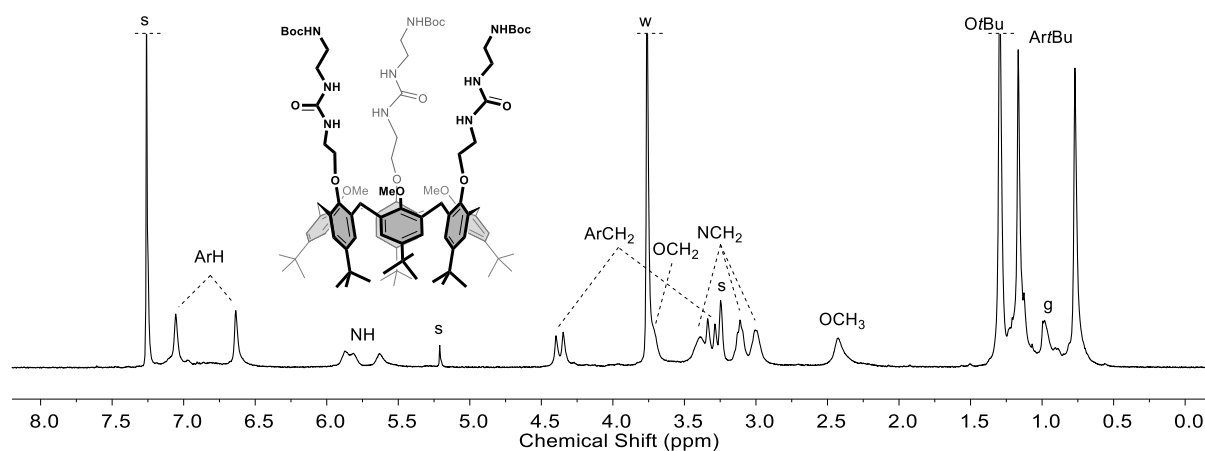

**Figure S1.** <sup>1</sup>H NMR spectrum (300 MHz, CDCl<sub>3</sub>/CD<sub>3</sub>OD, 10:1, 298 K) of calixarene **2**. s: solvent; w: water; g: grease.

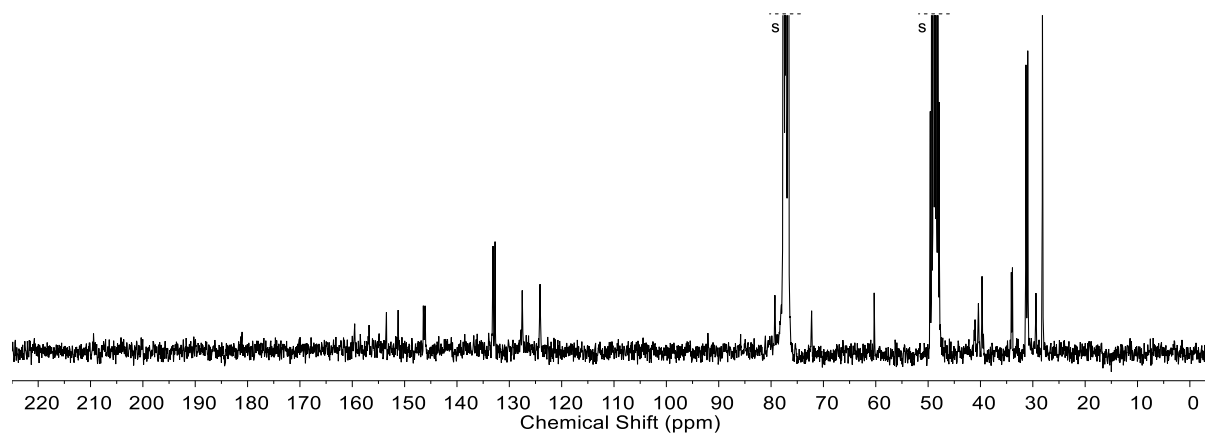

**Figure S2.** <sup>13</sup>C NMR spectrum (75 MHz, CDCl<sub>3</sub>/CD<sub>3</sub>OD, 5:1, 298 K) of calixarene **2**. s: solvent.

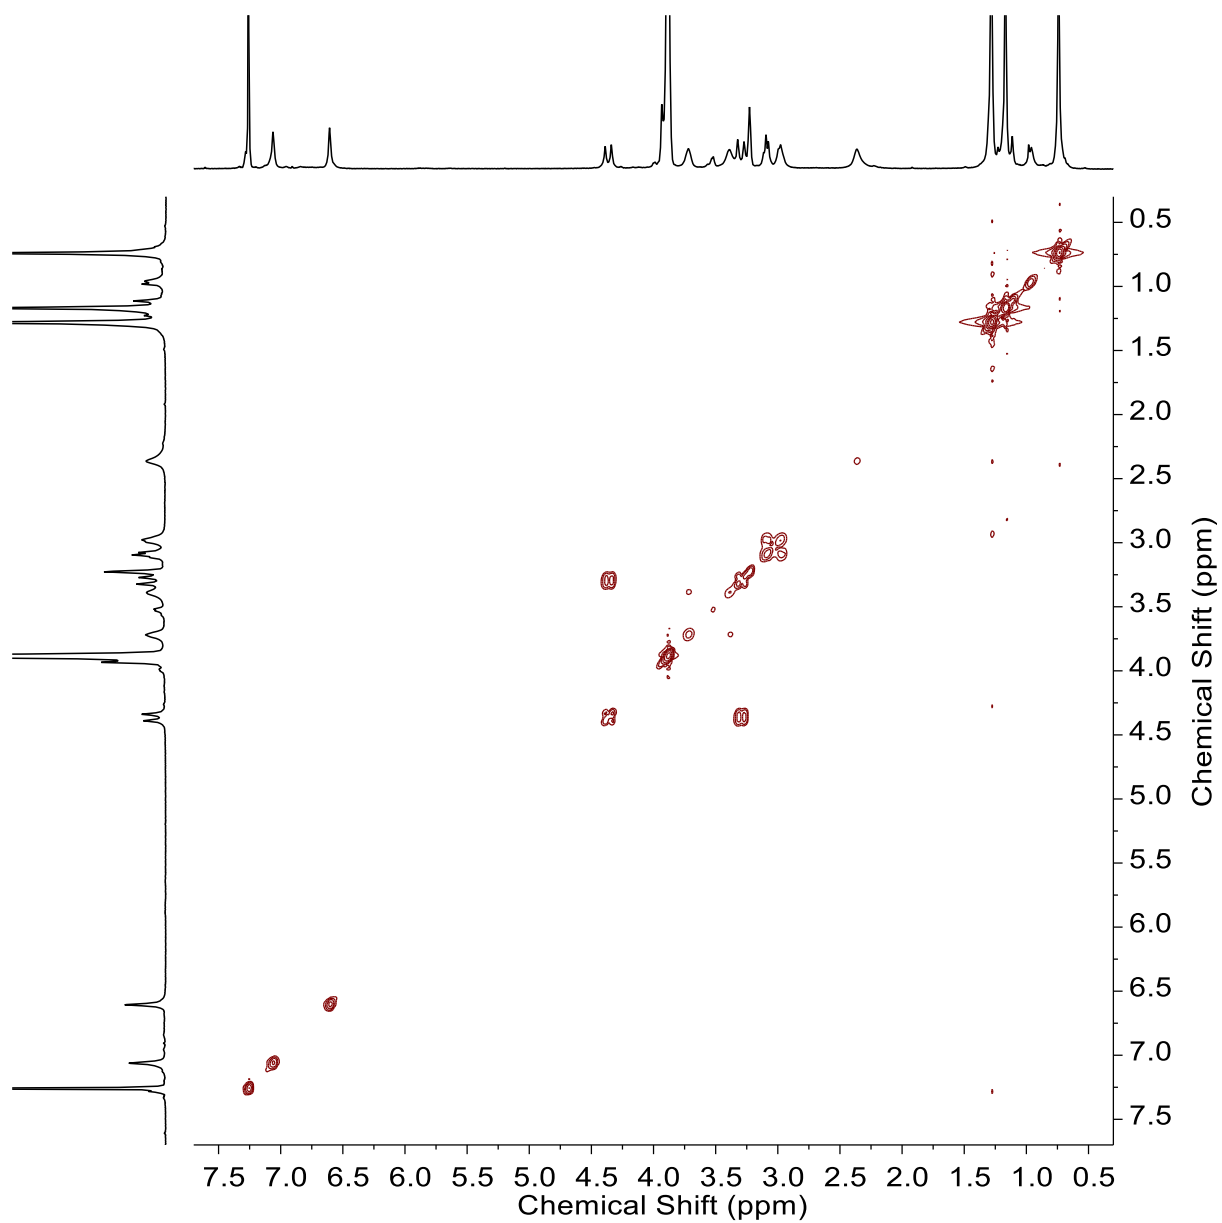

**Figure S3.**  $^1\text{H}$  dqfCOSY NMR spectrum (300 MHz,  $\text{CDCl}_3/\text{CD}_3\text{OD}$ , 5:1, 298 K) of calixarene **2**.

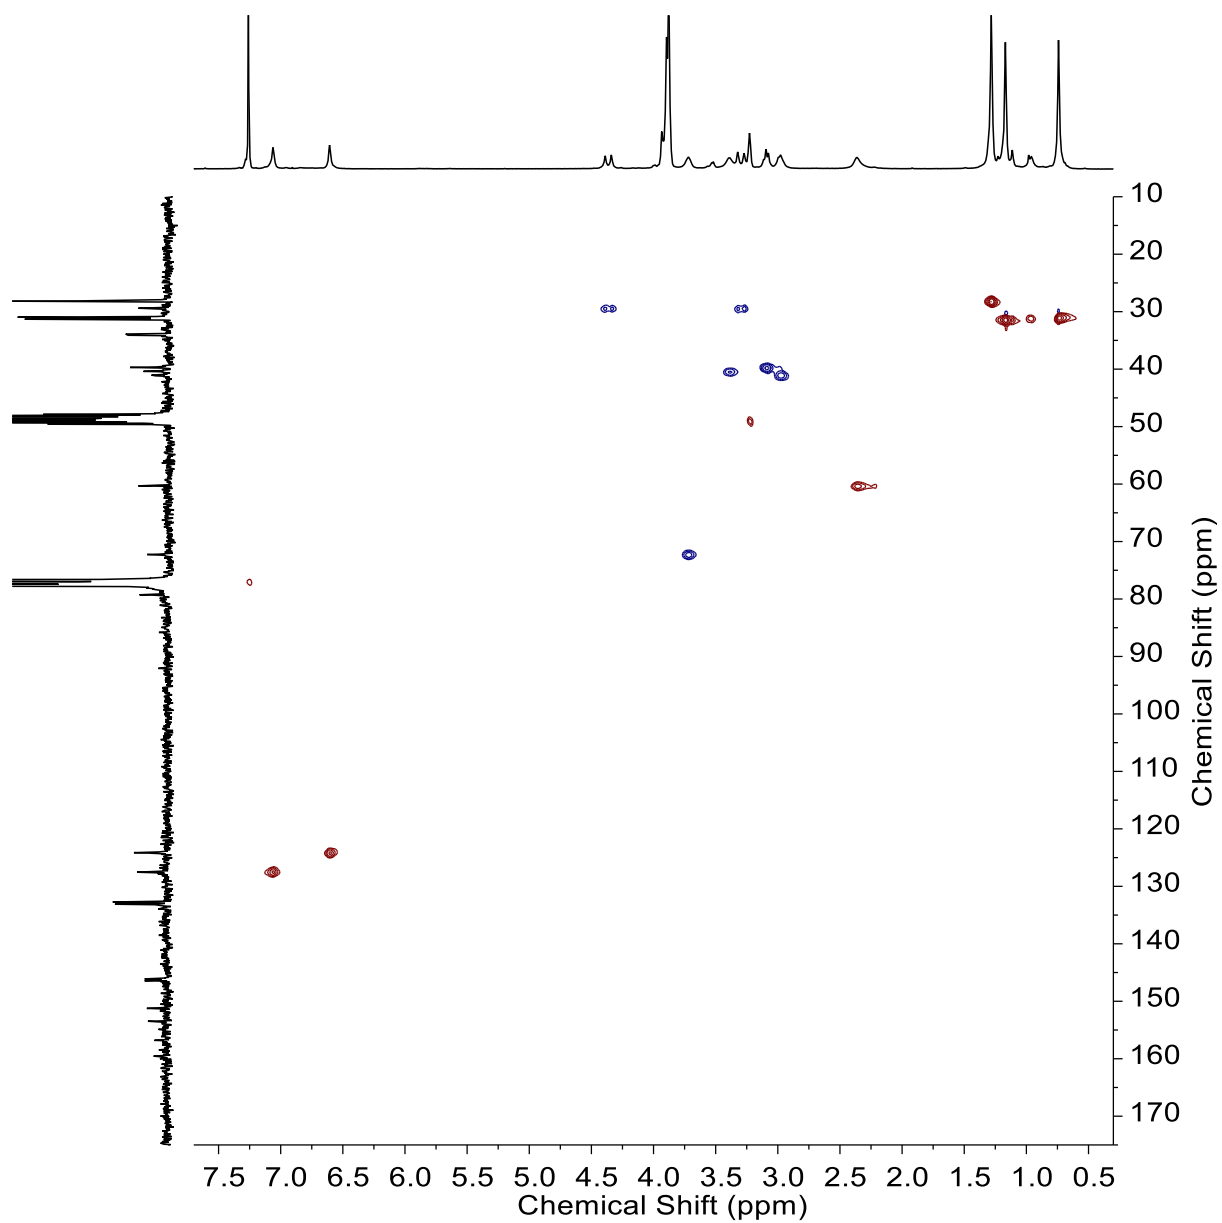

**Figure S4.** Edited  $^1\text{H}$ - $^{13}\text{C}$  HSQC NMR spectrum (7.0 Tesla,  $\text{CDCl}_3/\text{CD}_3\text{OD}$ , 5:1, 298 K) of calixarene **2**.

## 1.2. Calixarene 3

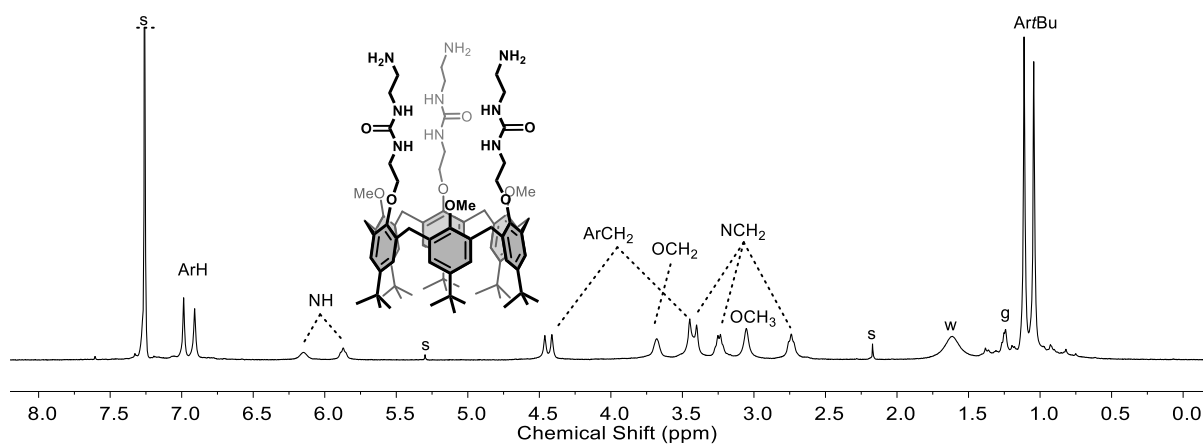

**Figure S5.** <sup>1</sup>H NMR spectrum (300 MHz, CDCl<sub>3</sub>, 298 K) of calixarene **3**. s: solvent; w: water; g: grease.

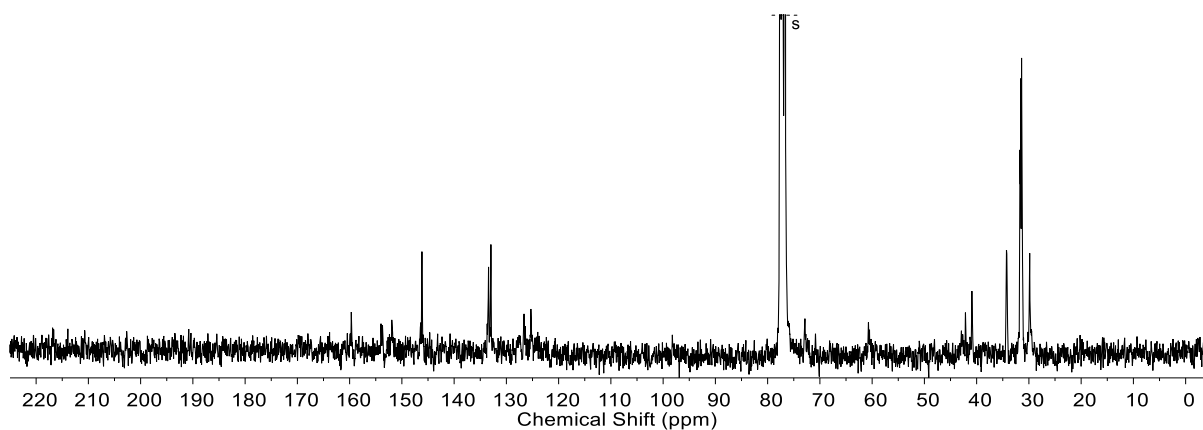

**Figure S6.** <sup>13</sup>C NMR spectrum (75 MHz, CDCl<sub>3</sub>, 298 K) of calixarene **3**. s: solvent.

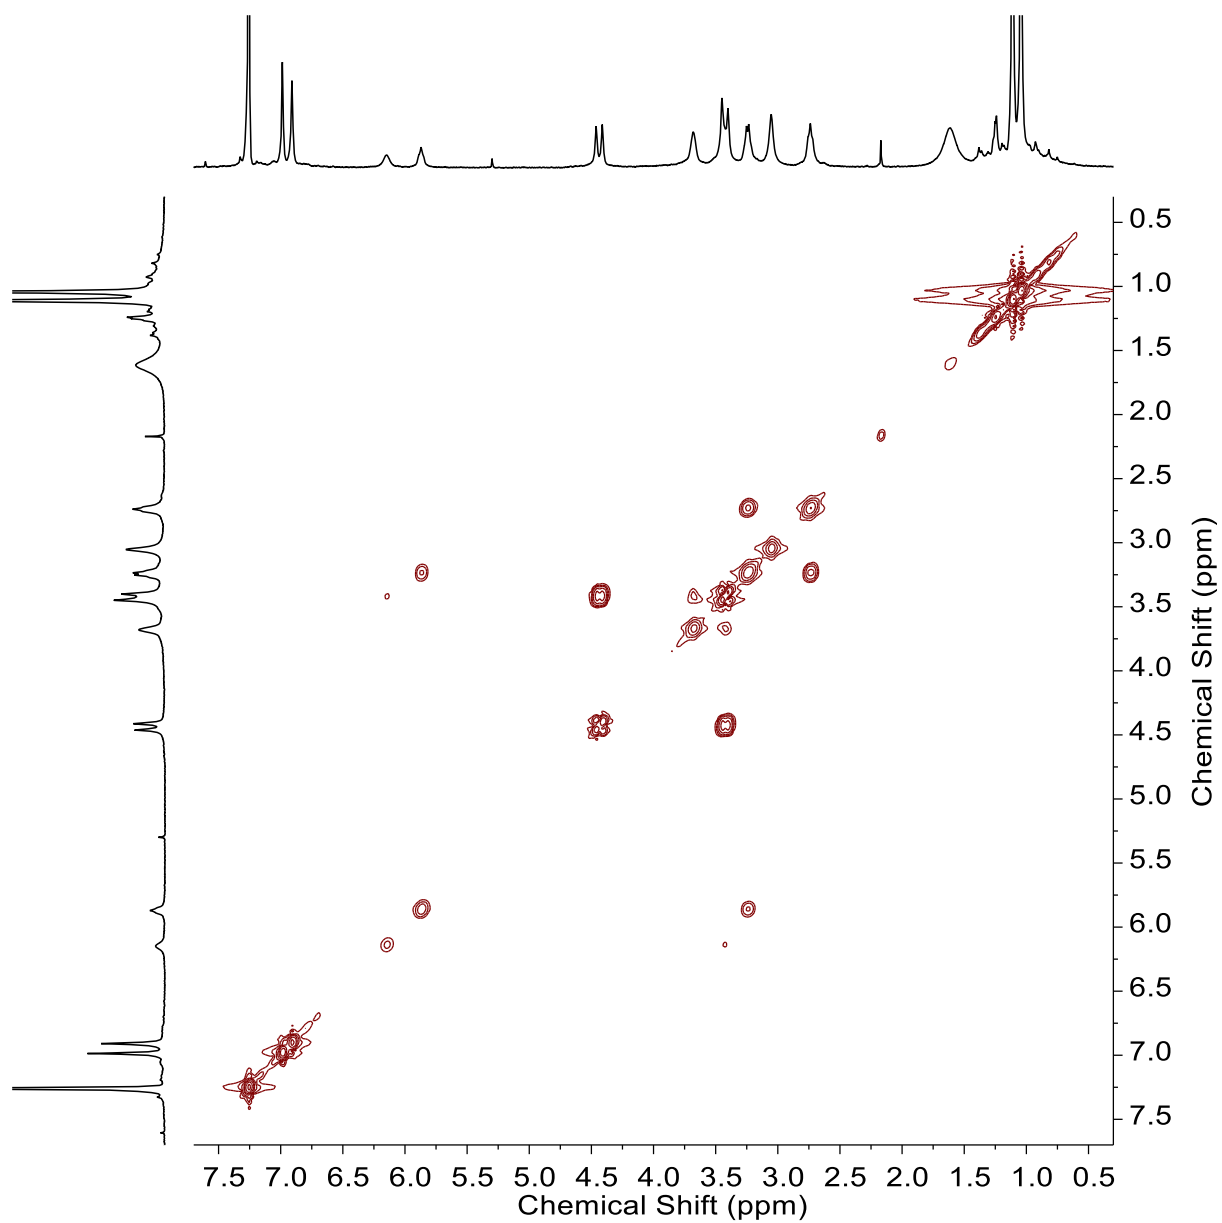

**Figure S7.**  $^1\text{H}$  dqfCOSY NMR spectrum (300 MHz,  $\text{CDCl}_3$ , 298 K) of calixarene **3**.

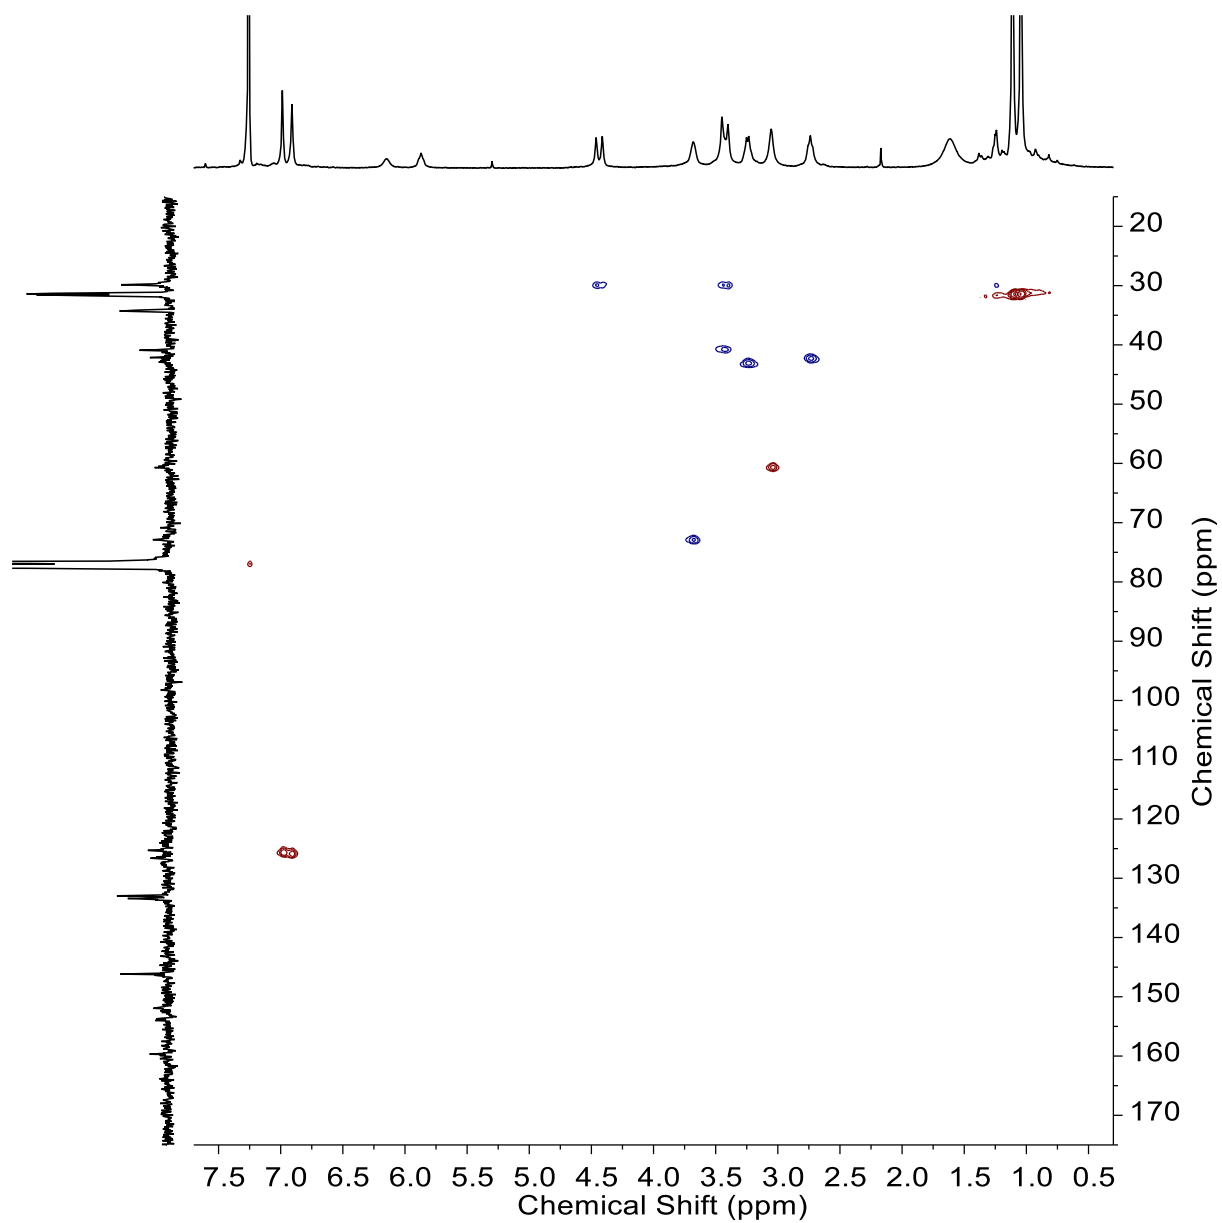

**Figure S8.** Edited  $^1\text{H}$ - $^{13}\text{C}$  HSQC NMR spectrum (7.0 Tesla,  $\text{CDCl}_3$ , 298 K) of calixarene **3**.

### 1.3. Calixarene C6U

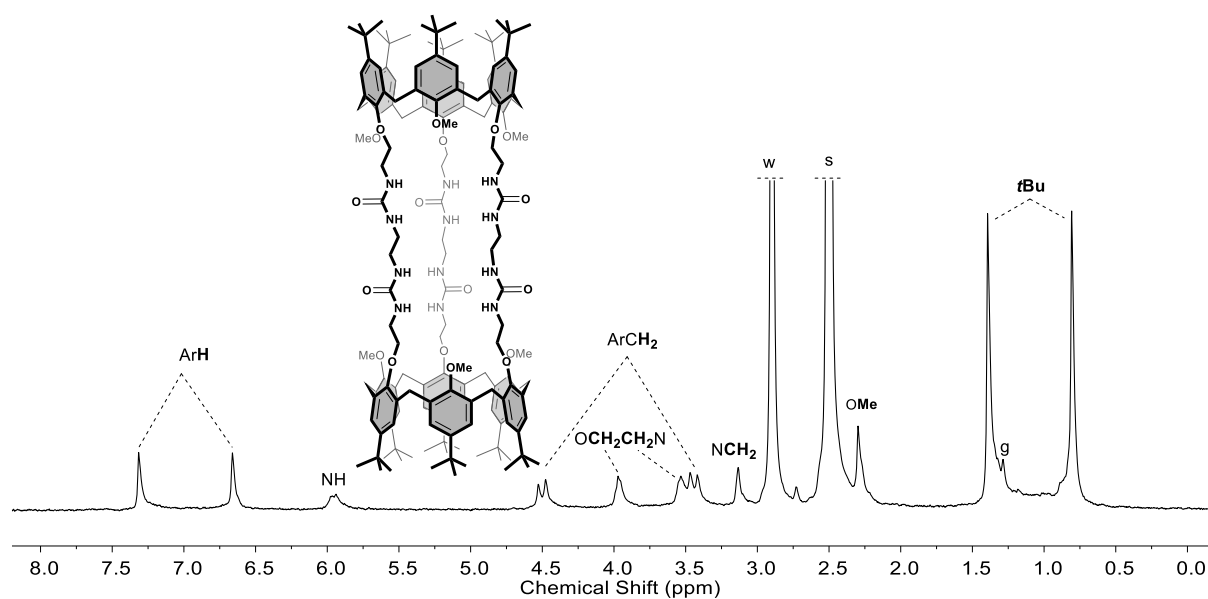

**Figure S9.**  $^1\text{H}$  NMR spectrum (300 MHz,  $\text{DMSO-}d_6$ , 373 K) of calixarene **C6U**. s: solvent; w: water; g: grease.

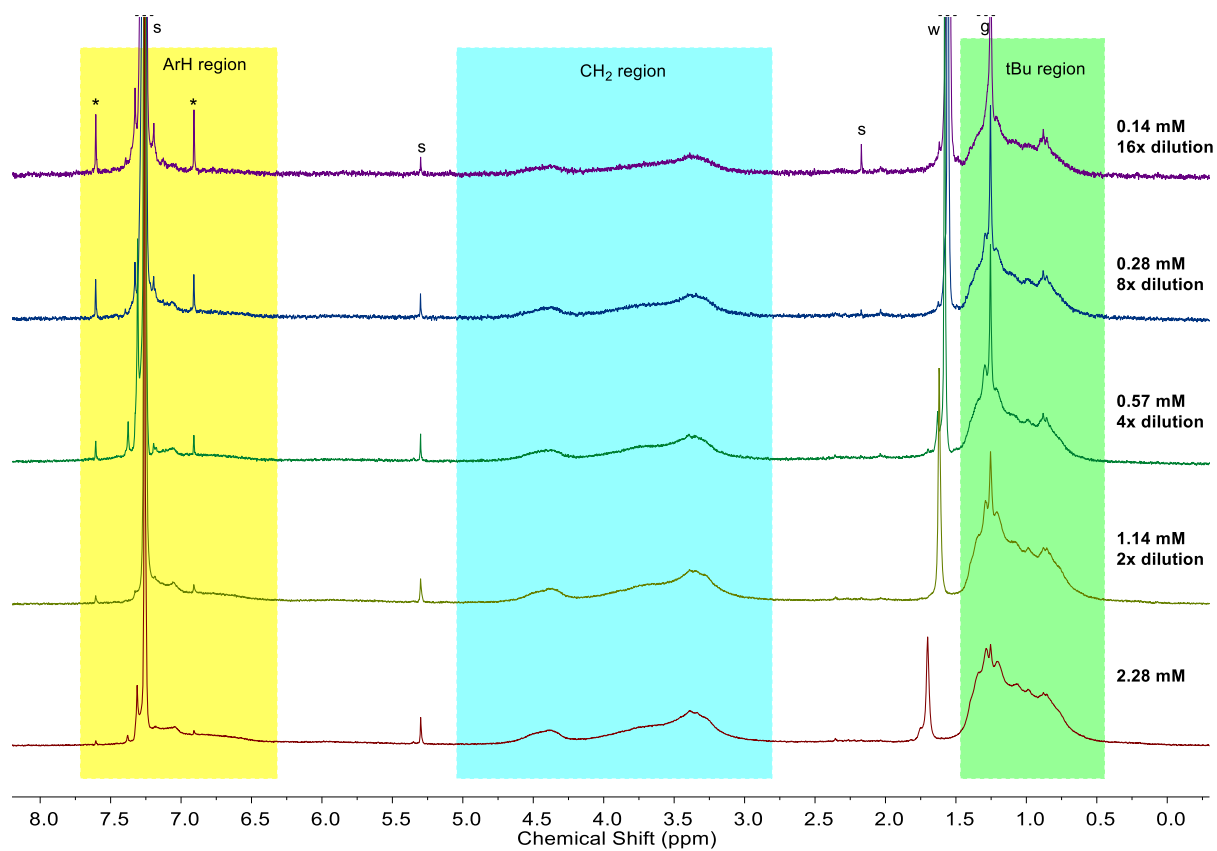

**Figure S10.**  $^1\text{H}$  NMR spectra (300 MHz,  $\text{CDCl}_3$ , 298 K) of calixarene **C6U** at variable concentration. s: solvent; w: water; g: grease; \*:  $^{13}\text{C}$  satellite peaks.



## 2. Binding studies

### 2.1. Binding studies with C3U

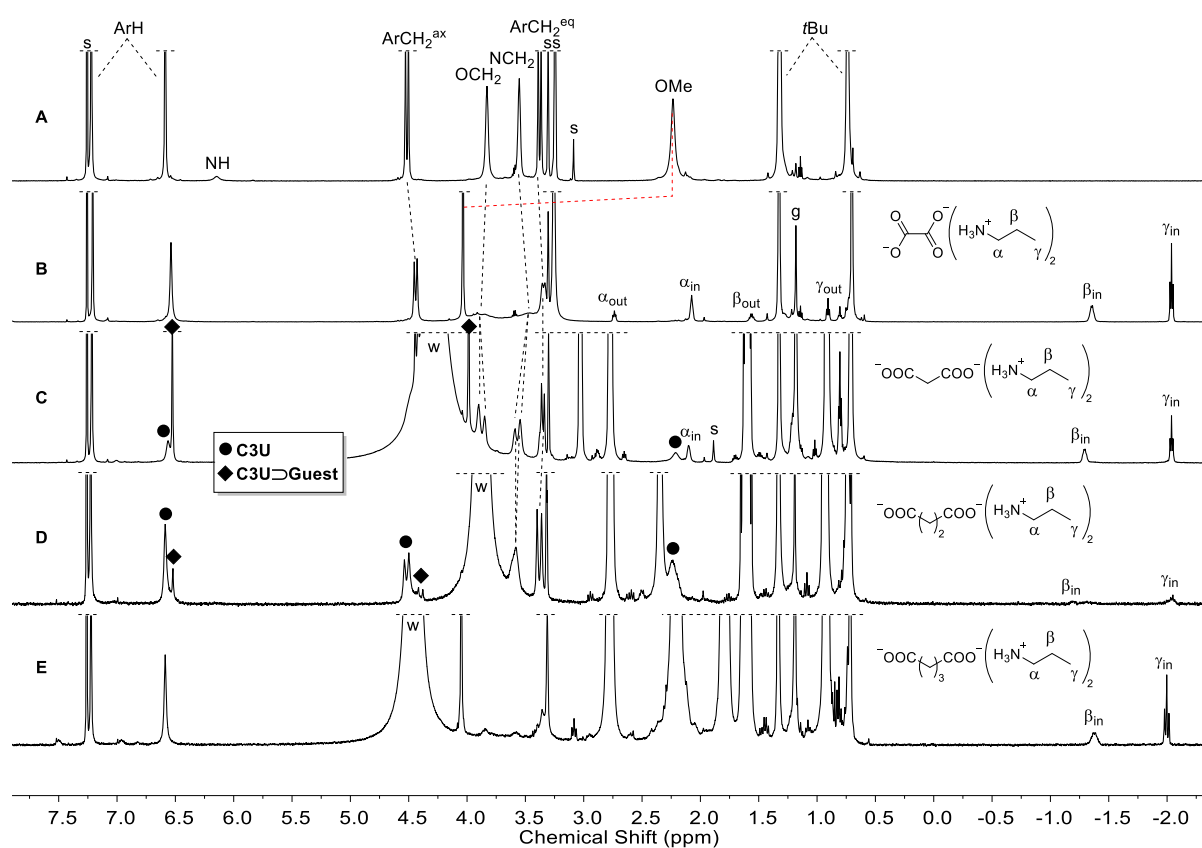

**Figure S11.**  $^1\text{H}$  NMR spectra ( $\text{CDCl}_3/\text{CD}_3\text{OD}$ , 10:1, 298 K) of C3U and its inclusion complexes with dicarboxylate salts ( $n\text{PrNH}_3^+$ ) $_2\text{X}^{2-}$ . (A) C3U (600 MHz); (B) ( $n\text{PrNH}_3^+$ ) $_2$ -oxalate (600 MHz); (C) ( $n\text{PrNH}_3^+$ ) $_2$ -malonate (600 MHz); (D) ( $n\text{PrNH}_3^+$ ) $_2$ -succinate (400 MHz); (E) ( $n\text{PrNH}_3^+$ ) $_2$ -glutarate (400 MHz). s: solvents; w: water; g: grease.

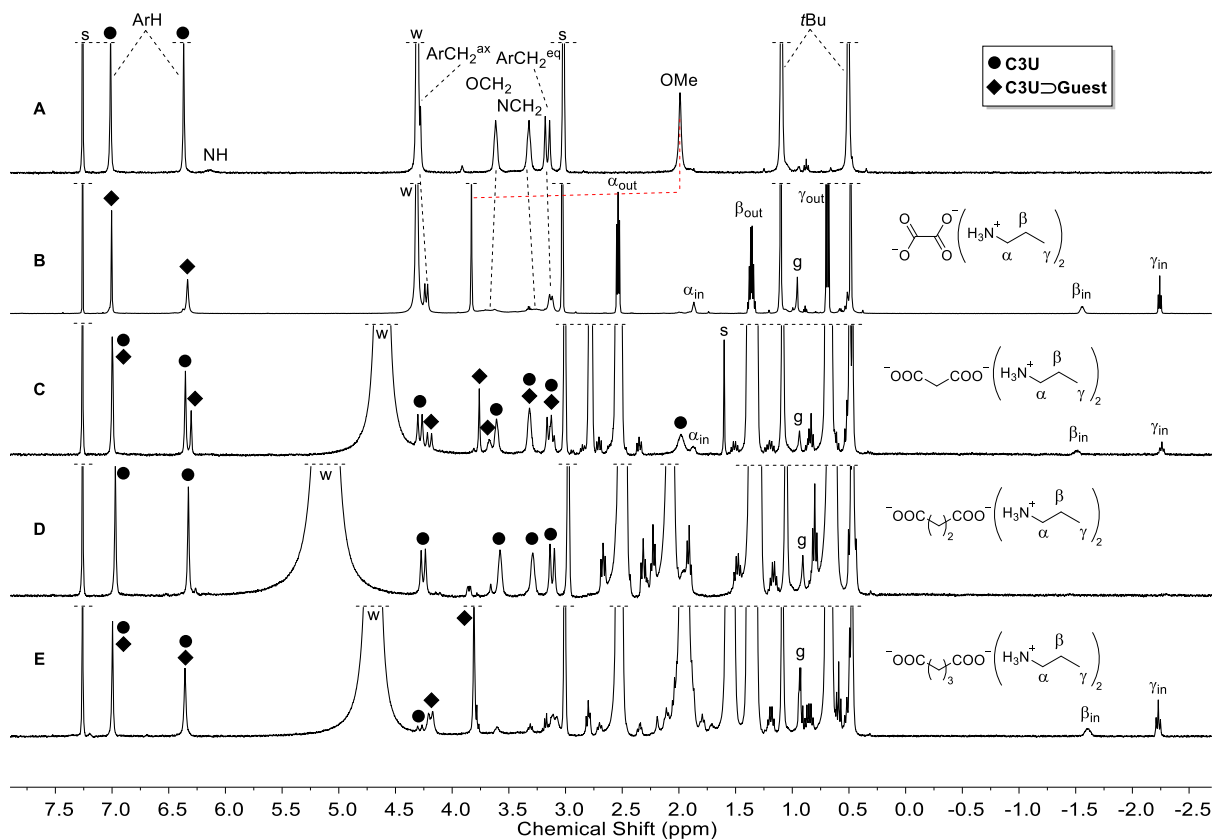

**Figure S12.**  $^1\text{H}$  NMR spectra ( $\text{CDCl}_3/\text{CD}_3\text{OD}$ , 1:1, 298 K) of **C3U** and its inclusion complexes with dicarboxylate salts  $(n\text{PrNH}_3^+)_2\text{X}^{2-}$ . (A) **C3U** (400 MHz); (B)  $(n\text{PrNH}_3^+)_2$ -oxalate (600 MHz); (C)  $(n\text{PrNH}_3^+)_2$ -malonate (400 MHz); (D)  $(n\text{PrNH}_3^+)_2$ -succinate (400 MHz); (E)  $(n\text{PrNH}_3^+)_2$ -glutarate (400 MHz). s: solvents; w: water; g: grease.

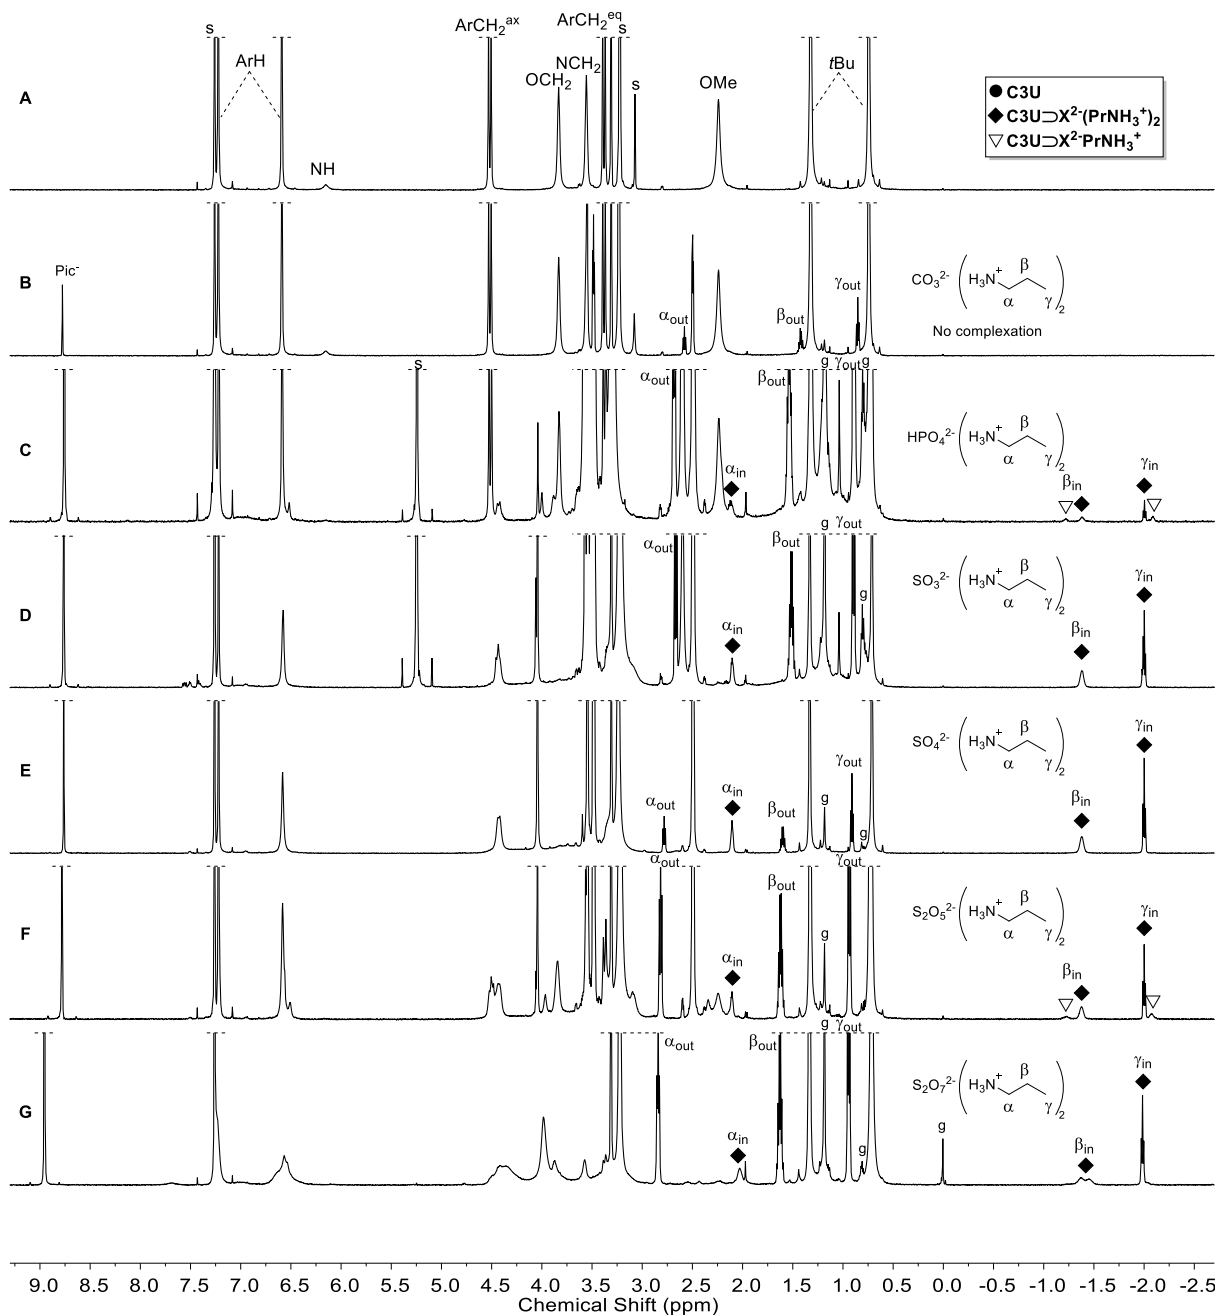

**Figure S13.**  $^1\text{H}$  NMR spectra (600MHz, CDCl $_3$ /CD $_3$ OD, 10:1, 298 K) of C3U and its inclusion complexes with salts ( $n\text{PrNH}_3^+$ ) $_2\text{X}^{2-}$  added as a mixture of  $n\text{PrNH}_3^+\text{Pic}^-$  and K $_2\text{X}$  in the presence of Kryptofix® 222. (A) C3U; (B) ( $n\text{PrNH}_3^+$ ) $_2\text{CO}_3^{2-}$  (no inclusion); (C) ( $n\text{PrNH}_3^+$ ) $_2\text{HPO}_4^{2-}$ ; (D) ( $n\text{PrNH}_3^+$ ) $_2\text{SO}_3^{2-}$ ; (E) ( $n\text{PrNH}_3^+$ ) $_2\text{SO}_4^{2-}$ ; (F) ( $n\text{PrNH}_3^+$ ) $_2\text{S}_2\text{O}_5^{2-}$ ; (G) ( $n\text{PrNH}_3^+$ ) $_2\text{S}_2\text{O}_7^{2-}$ . s: solvents; g: grease.

## 2.2. Binding studies with C3TU

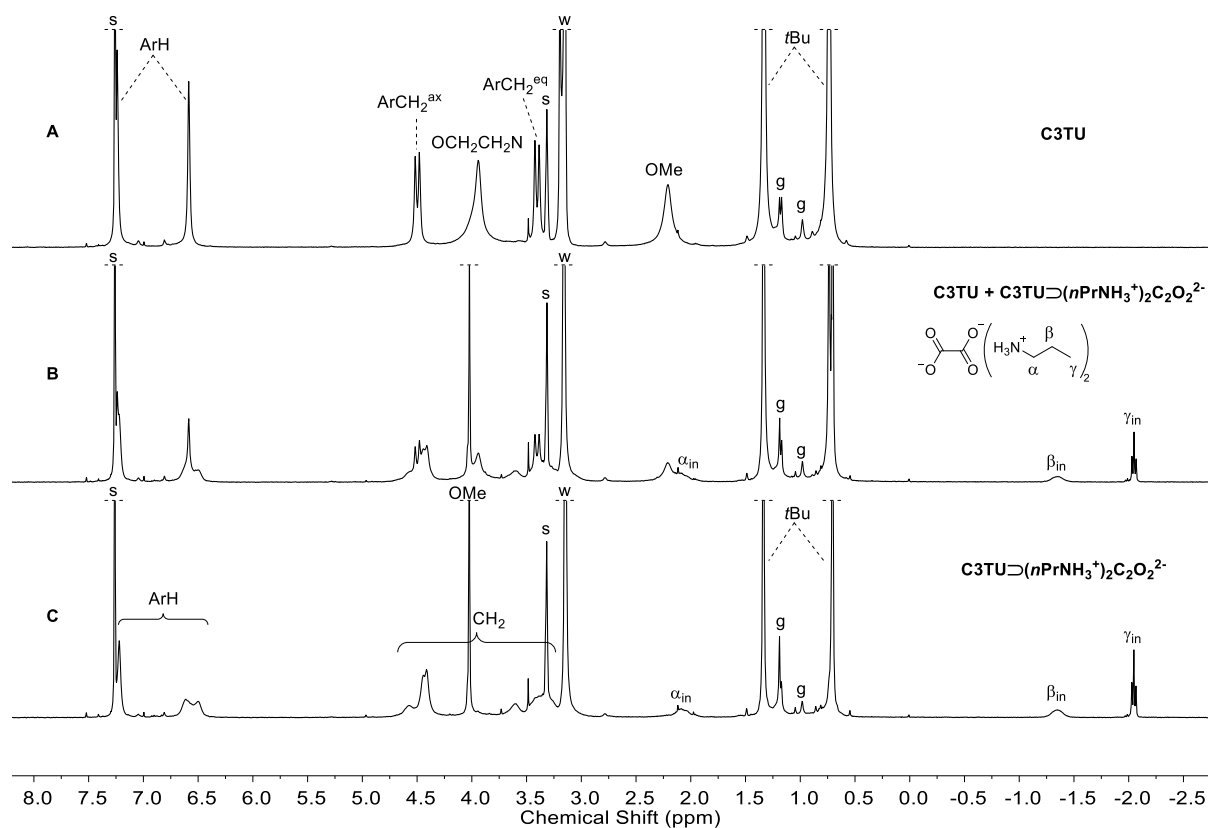

**Figure S14.**  $^1\text{H}$  NMR spectra (400 MHz,  $\text{CDCl}_3/\text{CD}_3\text{OD}$ , 10:1, 298 K) of **C3TU** and its inclusion complex with bis-propylammonium oxalate  $\text{C3TU} \supset (\text{nPrNH}_3^+)_2\text{C}_2\text{O}_4^{2-}$ . (A) **C3TU** ( $1.7 \times 10^{-3}$  M); (B) **C3TU** + 0.6 equiv.  $(\text{nPrNH}_3^+)_2\text{C}_2\text{O}_4^{2-}$ ; (C) **C3TU** + 1.0 equiv.  $(\text{nPrNH}_3^+)_2\text{C}_2\text{O}_4^{2-}$ . s: solvents; w: water; g: grease.

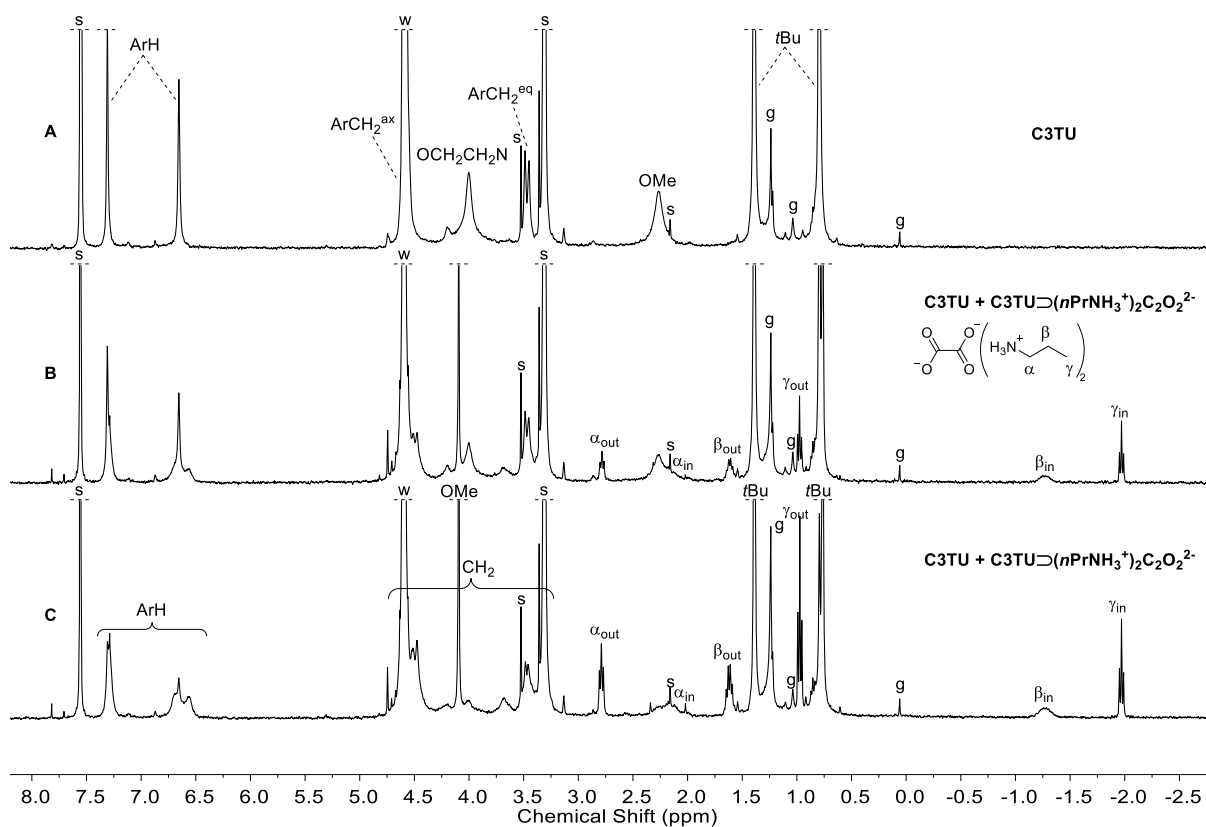

**Figure S15.**  $^1\text{H}$  NMR spectra (400 MHz,  $\text{CDCl}_3/\text{CD}_3\text{OD}$ , 1:1, 298 K) of **C3TU** and its inclusion complex with bis-propylammonium oxalate  $\text{C3TU}\supset(\text{nPrNH}_3^+)_2\text{C}_2\text{O}_4^{2-}$ . (A) **C3TU** ( $2.7 \times 10^{-4}$  M); (B) **C3TU** + 1.1 equiv.  $(\text{nPrNH}_3^+)_2\text{C}_2\text{O}_4^{2-}$ ; (C) **C3TU** + 2.5 equiv.  $(\text{nPrNH}_3^+)_2\text{C}_2\text{O}_4^{2-}$ . s: solvents; w: water; g: grease.

### 2.3. Binding studies with C6U

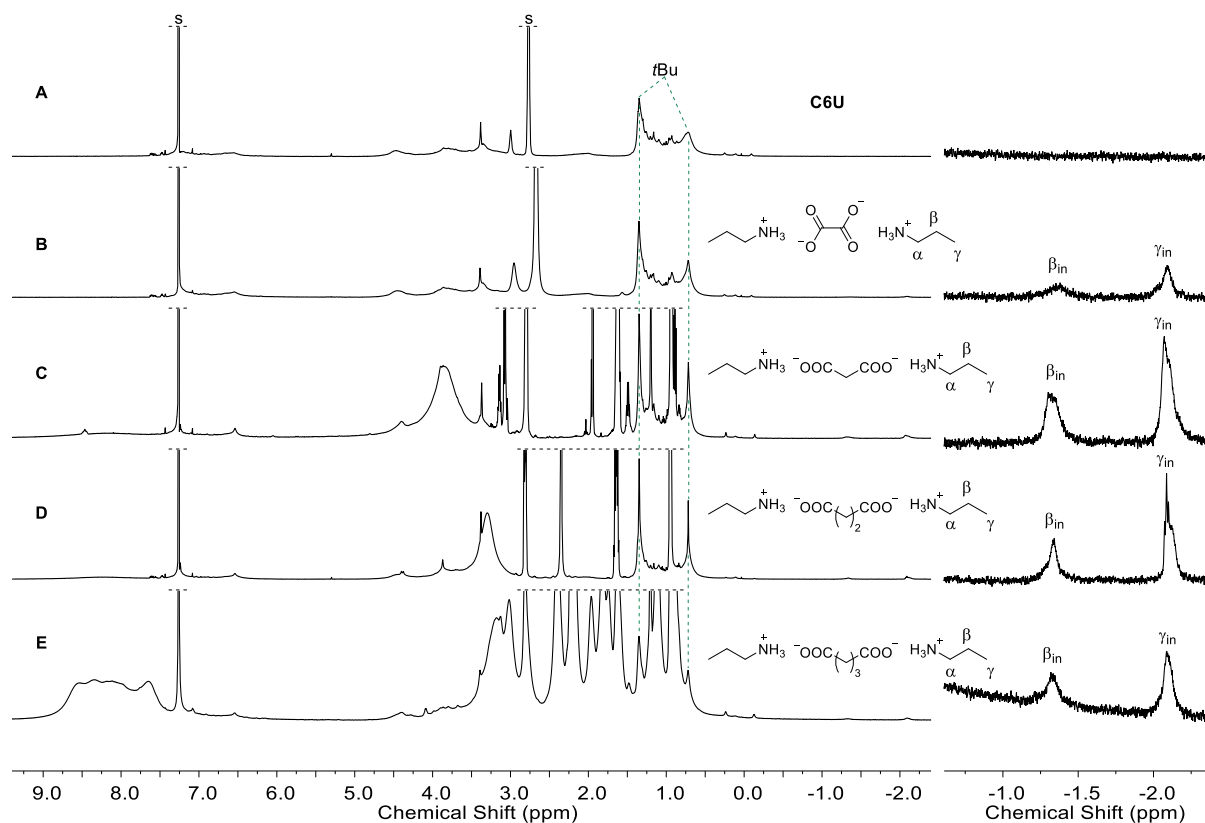

**Figure S16.**  $^1\text{H}$  NMR spectra (600MHz,  $\text{CDCl}_3/\text{CD}_3\text{OD}$ , 50:1, 253 K) of C6U and its inclusion complexes with dicarboxylate salts  $(n\text{PrNH}_3^+)_2\text{X}^-$ . The spectra did not further evolve after 48 h at 65 °C. (A) C6U; (B)  $(n\text{PrNH}_3^+)_2$ -oxalate (excess solid, insoluble); (C)  $(n\text{PrNH}_3^+)_2$ -malonate; (D)  $(n\text{PrNH}_3^+)_2$ -succinate; (E)  $(n\text{PrNH}_3^+)_2$ -glutarate. s: solvents.

### 3. Molecular modeling

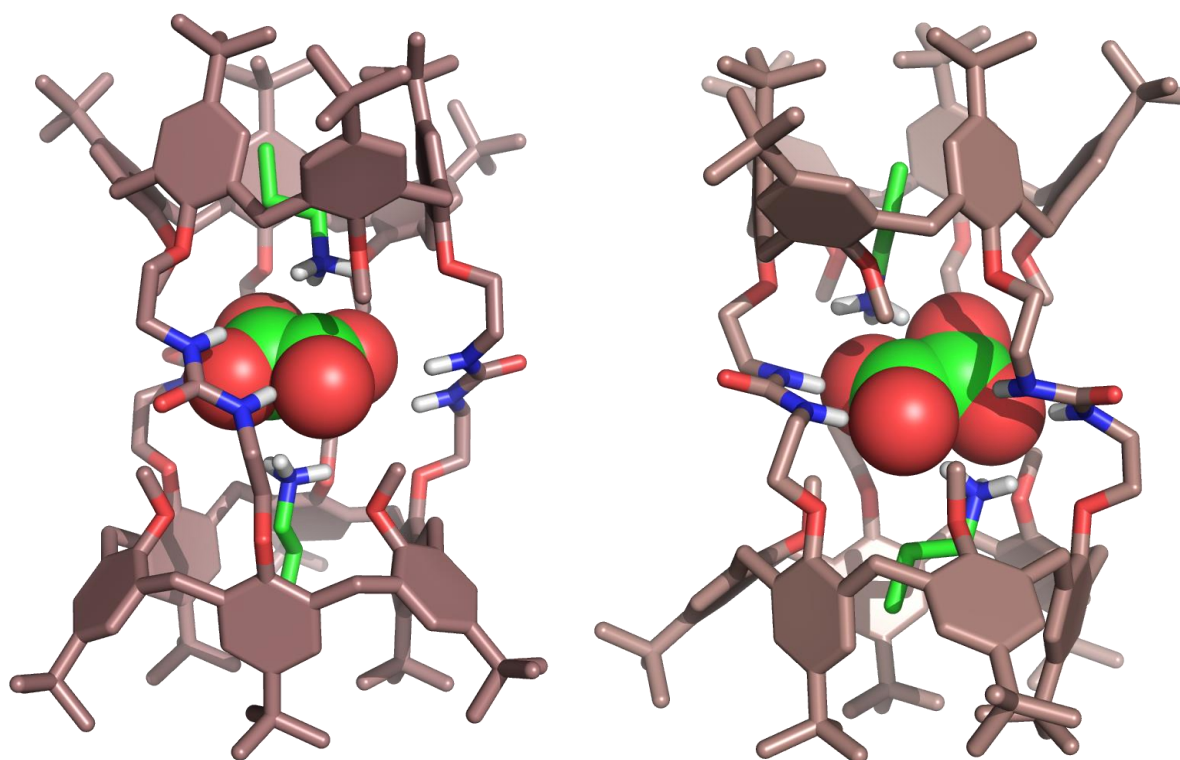

**Figure S17.** UFF (left) and PM6 (right) geometry optimized structure of  $\text{C3U}\supset(\text{nPrNH}_3^+)_2\text{C}_2\text{O}_2^{2-}$ . Non-polar hydrogen atoms are omitted for clarity.

**Table S1.** Cartesian coordinates (in Å) for the PM6 model of  $\text{C3U} \supset (\text{PrNH}_3^+)_2\text{C}_2\text{O}_4^{2-}$ .

|   |        |        |        |   |        |         |        |
|---|--------|--------|--------|---|--------|---------|--------|
| C | 0.000  | 0.000  | 0.000  | C | 1.103  | -1.776  | 6.945  |
| C | 10.481 | 0.000  | 0.000  | C | 10.898 | -6.302  | 2.804  |
| C | 2.345  | 2.336  | 0.000  | C | 1.817  | -2.977  | 7.139  |
| C | 4.027  | -2.834 | 8.136  | C | 10.604 | -6.036  | 4.155  |
| C | 3.646  | -7.420 | 0.565  | O | 3.200  | -2.966  | 6.944  |
| C | 0.618  | 0.894  | 0.897  | O | 9.284  | -5.906  | 4.595  |
| C | 9.754  | -1.050 | -0.603 | C | 1.154  | -4.193  | 7.365  |
| C | 3.719  | 2.719  | 0.581  | C | 11.610 | -5.749  | 5.097  |
| C | 5.362  | -3.498 | 7.749  | C | -0.246 | -4.215  | 7.304  |
| C | 5.030  | -6.755 | 0.430  | C | 12.932 | -5.662  | 4.646  |
| O | 1.982  | 1.136  | 0.749  | C | -0.979 | -3.063  | 6.998  |
| O | 8.364  | -1.090 | -0.447 | C | 13.264 | -5.911  | 3.309  |
| C | -0.046 | 1.402  | 2.026  | C | -0.290 | -1.850  | 6.847  |
| C | 10.398 | -2.111 | -1.256 | C | 12.238 | -6.233  | 2.406  |
| N | 4.607  | 1.543  | 0.668  | C | -2.508 | -3.129  | 6.877  |
| N | 6.176  | -2.677 | 6.825  | C | 14.709 | -5.823  | 2.796  |
| N | 5.460  | -6.107 | 1.682  | C | -3.090 | -2.945  | 8.296  |
| C | -1.355 | 0.964  | 2.275  | C | 15.033 | -7.088  | 1.966  |
| C | 11.802 | -2.115 | -1.312 | C | -3.048 | -2.021  | 5.945  |
| C | 4.932  | 0.872  | -0.521 | C | 14.825 | -4.558  | 1.918  |
| C | 6.788  | -1.528 | 7.372  | C | -2.942 | -4.492  | 6.291  |
| C | 6.216  | -6.808 | 2.629  | C | 15.740 | -5.728  | 3.945  |
| C | -1.987 | 0.046  | 1.429  | C | 1.906  | -5.461  | 7.665  |
| C | 12.552 | -1.089 | -0.732 | C | 11.222 | -5.582  | 6.545  |
| O | 4.823  | 1.397  | -1.627 | C | 1.435  | -6.607  | 6.812  |
| O | 7.034  | -1.452 | 8.575  | C | 12.094 | -4.629  | 7.311  |
| O | 6.583  | -7.971 | 2.459  | C | 1.698  | -6.631  | 5.433  |
| C | -1.302 | -0.413 | 0.290  | C | 11.668 | -3.318  | 7.584  |
| C | 11.874 | -0.053 | -0.062 | C | 3.587  | -5.256  | 4.791  |
| N | 5.345  | -0.473 | -0.373 | C | 9.373  | -3.240  | 8.211  |
| N | 7.170  | -0.529 | 6.472  | O | 2.155  | -5.511  | 4.760  |
| N | 6.603  | -6.047 | 3.749  | O | 10.380 | -2.926  | 7.199  |
| C | -3.388 | -0.514 | 1.710  | C | 1.374  | -7.760  | 4.652  |
| C | 14.081 | -1.017 | -0.839 | C | 12.521 | -2.386  | 8.206  |
| C | 6.212  | -1.034 | -1.433 | C | 0.661  | -8.804  | 5.245  |
| C | 8.141  | 0.496  | 6.924  | C | 13.782 | -2.823  | 8.628  |
| C | 7.103  | -6.720 | 4.963  | C | 0.294  | -8.760  | 6.602  |
| C | -4.297 | -0.228 | 0.493  | C | 14.227 | -4.135  | 8.396  |
| C | 14.427 | 0.220  | -1.702 | C | 0.721  | -7.675  | 7.377  |
| C | 7.612  | -0.402 | -1.491 | C | 13.364 | -5.029  | 7.752  |
| C | 9.531  | 0.154  | 6.376  | C | -0.567 | -9.895  | 7.169  |
| C | 8.564  | -7.162 | 4.792  | C | 15.646 | -4.525  | 8.827  |
| C | -3.249 | -2.037 | 1.938  | C | 0.203  | -11.226 | 7.022  |
| C | 14.703 | -0.877 | 0.568  | C | 15.733 | -4.437  | 10.366 |
| C | -4.039 | 0.118  | 2.960  | C | -0.910 | -9.695  | 8.662  |
| C | 14.688 | -2.272 | -1.505 | C | 16.026 | -5.958  | 8.392  |
| C | 0.663  | 2.376  | 2.932  | C | -1.892 | -9.937  | 6.371  |
| C | 9.606  | -3.222 | -1.893 | C | 16.644 | -3.545  | 8.164  |
| C | 0.473  | 2.050  | 4.385  | C | 1.839  | -7.830  | 3.227  |
| C | 10.014 | -4.573 | -1.373 | C | 12.134 | -0.941  | 8.355  |
| C | 1.351  | 1.162  | 5.027  | C | 0.900  | -7.219  | 2.225  |
| C | 9.721  | -4.977 | -0.060 | C | 12.590 | -0.117  | 7.177  |
| C | 3.693  | 1.460  | 4.683  | C | 1.417  | -6.595  | 1.072  |
| C | 7.738  | -3.856 | 0.755  | C | 11.752 | 0.875   | 6.630  |
| O | 2.486  | 0.716  | 4.341  | O | 2.777  | -6.314  | 0.948  |
| O | 9.164  | -4.114 | 0.874  | O | 10.449 | 1.019   | 7.125  |
| C | 1.084  | 0.670  | 6.317  | C | 0.565  | -6.092  | 0.072  |
| C | 10.106 | -6.246 | 0.418  | C | 12.201 | 1.738   | 5.616  |
| C | 0.031  | 1.250  | 7.035  | C | -0.819 | -6.145  | 0.278  |
| C | 10.791 | -7.108 | -0.442 | C | 13.482 | 1.532   | 5.084  |
| C | -0.806 | 2.222  | 6.459  | C | -1.361 | -6.713  | 1.436  |
| C | 11.123 | -6.722 | -1.752 | C | 14.302 | 0.495   | 5.538  |
| C | -0.597 | 2.577  | 5.120  | C | -0.487 | -7.265  | 2.390  |
| C | 10.722 | -5.459 | -2.201 | C | 13.856 | -0.293  | 6.612  |
| C | -1.947 | 2.815  | 7.294  | C | -2.871 | -6.755  | 1.699  |
| C | 11.932 | -7.691 | -2.623 | C | 15.643 | 0.152   | 4.878  |
| C | -1.389 | 3.297  | 8.653  | C | -3.307 | -8.234  | 1.822  |
| C | 11.133 | -9.004 | -2.780 | C | 16.759 | 0.154   | 5.947  |
| C | -2.622 | 4.020  | 6.602  | C | -3.162 | -5.995  | 3.013  |
| C | 12.221 | -7.129 | -4.033 | C | 15.496 | -1.251  | 4.242  |
| C | -3.004 | 1.707  | 7.503  | C | -3.693 | -6.096  | 0.569  |
| C | 13.285 | -7.954 | -1.920 | C | 16.034 | 1.155   | 3.770  |
| C | 1.873  | -0.482 | 6.865  | C | 1.163  | -5.543  | -1.197 |
| C | 9.798  | -6.641 | 1.835  | C | 11.326 | 2.863   | 5.122  |



|   |        |        |        |   |        |         |        |
|---|--------|--------|--------|---|--------|---------|--------|
| C | 0.498  | -4.285 | -1.675 | H | 14.337 | -2.363  | -2.555 |
| C | 11.328 | 2.938  | 3.621  | H | 14.405 | -3.183  | -0.935 |
| C | 0.952  | -3.016 | -1.261 | H | 1.766  | 2.318   | 2.706  |
| C | 10.445 | 2.150  | 2.860  | H | 0.298  | 3.407   | 2.707  |
| C | 3.323  | -2.952 | -0.829 | H | 8.517  | -3.071  | -1.676 |
| C | 8.151  | 1.933  | 3.478  | H | 9.752  | -3.166  | -3.001 |
| O | 1.966  | -2.928 | -0.310 | H | 4.452  | 0.940   | 4.042  |
| O | 9.495  | 1.368  | 3.518  | H | 3.906  | 1.341   | 5.763  |
| C | 0.314  | -1.839 | -1.685 | H | 3.553  | 2.519   | 4.397  |
| C | 10.553 | 2.074  | 1.461  | H | 7.343  | -4.159  | 1.747  |
| C | -0.795 | -1.945 | -2.540 | H | 7.278  | -4.440  | -0.060 |
| C | 11.477 | 2.908  | 0.815  | H | 7.674  | -2.753  | 0.598  |
| C | -1.287 | -3.190 | -2.945 | H | -0.138 | 0.919   | 8.059  |
| C | 12.340 | 3.739  | 1.539  | H | 11.072 | -8.094  | -0.074 |
| C | -0.612 | -4.349 | -2.523 | H | -1.262 | 3.280   | 4.621  |
| C | 12.259 | 3.733  | 2.942  | H | 10.960 | -5.131  | -3.210 |
| C | -2.565 | -3.337 | -3.779 | H | -2.163 | 3.878   | 9.200  |
| C | 13.419 | 4.586  | 0.855  | H | -0.503 | 3.947   | 8.481  |
| C | -2.256 | -4.168 | -5.044 | H | -1.089 | 2.439   | 9.290  |
| C | 13.389 | 6.026  | 1.419  | H | 11.651 | -9.685  | -3.488 |
| C | -3.617 | -4.051 | -2.897 | H | 10.117 | -8.775  | -3.170 |
| C | 14.782 | 3.915  | 1.149  | H | 11.029 | -9.525  | -1.805 |
| C | -3.146 | -1.977 | -4.226 | H | -3.134 | 3.703   | 5.669  |
| C | 13.225 | 4.671  | -0.675 | H | -1.865 | 4.801   | 6.371  |
| C | 0.763  | -0.488 | -1.203 | H | -3.387 | 4.461   | 7.279  |
| C | 9.716  | 1.098  | 0.686  | H | 12.807 | -7.872  | -4.618 |
| H | 1.586  | 3.127  | 0.148  | H | 12.815 | -6.193  | -3.963 |
| H | 2.432  | 2.014  | -1.064 | H | 11.270 | -6.933  | -4.573 |
| H | 3.546  | -3.351 | 8.990  | H | -3.377 | 1.358   | 6.516  |
| H | 4.149  | -1.745 | 8.321  | H | -3.857 | 2.104   | 8.094  |
| H | 3.291  | -7.824 | -0.406 | H | -2.564 | 0.846   | 8.050  |
| H | 3.644  | -8.187 | 1.365  | H | 13.934 | -8.581  | -2.568 |
| H | 4.191  | 3.476  | -0.106 | H | 13.133 | -8.483  | -0.956 |
| H | 3.611  | 3.146  | 1.609  | H | 13.793 | -6.985  | -1.721 |
| H | 5.959  | -3.654 | 8.692  | H | 2.767  | -0.675  | 6.203  |
| H | 5.169  | -4.477 | 7.241  | H | 2.240  | -0.227  | 7.892  |
| H | 5.777  | -7.550 | 0.149  | H | 8.860  | -6.101  | 2.158  |
| H | 4.979  | -5.962 | -0.360 | H | 9.595  | -7.742  | 1.879  |
| H | 4.709  | 1.078  | 1.584  | H | -0.748 | -5.167  | 7.476  |
| H | 5.965  | -2.750 | 5.813  | H | 13.704 | -5.382  | 5.359  |
| H | 5.155  | -5.126 | 1.835  | H | -0.850 | -0.941  | 6.633  |
| H | -1.858 | 1.346  | 3.162  | H | 12.476 | -6.413  | 1.357  |
| H | 12.282 | -2.954 | -1.812 | H | -2.778 | -1.962  | 8.708  |
| H | -1.783 | -1.129 | -0.377 | H | -2.714 | -3.747  | 8.968  |
| H | 12.451 | 0.726  | 0.437  | H | -4.199 | -2.992  | 8.259  |
| H | 5.423  | -0.872 | 0.568  | H | 16.125 | -7.148  | 1.770  |
| H | 6.969  | -0.582 | 5.463  | H | 14.507 | -7.065  | 0.989  |
| H | 6.275  | -5.063 | 3.865  | H | 14.716 | -7.994  | 2.528  |
| H | 5.704  | -0.842 | -2.421 | H | -2.964 | -1.025  | 6.426  |
| H | 6.303  | -2.136 | -1.249 | H | -4.119 | -2.203  | 5.714  |
| H | 8.178  | 0.514  | 8.051  | H | -2.471 | -2.023  | 4.995  |
| H | 7.803  | 1.494  | 6.548  | H | 15.809 | -4.533  | 1.407  |
| H | 6.490  | -7.637 | 5.185  | H | 14.724 | -3.655  | 2.559  |
| H | 7.033  | -5.987 | 5.810  | H | 14.017 | -4.543  | 1.153  |
| H | -3.966 | -0.806 | -0.396 | H | -2.856 | -5.300  | 7.048  |
| H | -4.263 | 0.856  | 0.250  | H | -2.294 | -4.737  | 5.419  |
| H | -5.344 | -0.517 | 0.726  | H | -3.999 | -4.451  | 5.952  |
| H | 15.521 | 0.267  | -1.880 | H | 16.768 | -5.704  | 3.521  |
| H | 14.107 | 1.152  | -1.189 | H | 15.648 | -6.612  | 4.611  |
| H | 13.899 | 0.152  | -2.678 | H | 15.590 | -4.796  | 4.532  |
| H | 8.098  | -0.576 | -2.473 | H | 1.777  | -5.697  | 8.751  |
| H | 7.586  | 0.676  | -1.224 | H | 2.997  | -5.307  | 7.464  |
| H | 9.813  | -0.902 | 6.601  | H | 10.157 | -5.216  | 6.575  |
| H | 9.625  | 0.411  | 5.293  | H | 11.257 | -6.593  | 7.026  |
| H | 8.968  | -7.626 | 5.715  | H | 3.813  | -5.059  | 3.717  |
| H | 8.686  | -7.813 | 3.899  | H | 4.145  | -6.117  | 5.191  |
| H | -2.909 | -2.548 | 1.011  | H | 3.702  | -4.330  | 5.403  |
| H | -4.222 | -2.471 | 2.248  | H | 8.549  | -3.693  | 7.621  |
| H | -2.494 | -2.224 | 2.733  | H | 9.076  | -2.260  | 8.656  |
| H | 15.806 | -0.779 | 0.490  | H | 9.768  | -3.934  | 8.975  |
| H | 14.460 | -1.779 | 1.170  | H | 0.391  | -9.662  | 4.632  |
| H | 14.307 | 0.017  | 1.095  | H | 14.428 | -2.115  | 9.147  |
| H | -4.171 | 1.211  | 2.814  | H | 0.498  | -7.633  | 8.440  |
| H | -3.412 | -0.066 | 3.860  | H | 13.661 | -6.062  | 7.579  |
| H | -5.037 | -0.339 | 3.133  | H | 1.204  | -11.130 | 7.496  |
| H | 15.797 | -2.192 | -1.512 | H | 0.341  | -11.489 | 5.952  |

|   |        |         |        |   |        |        |        |
|---|--------|---------|--------|---|--------|--------|--------|
| H | -0.358 | -12.048 | 7.516  | H | -3.133 | -4.169 | -5.725 |
| H | 16.737 | -4.765  | 10.710 | H | -2.017 | -5.221 | -4.783 |
| H | 14.959 | -5.095  | 10.820 | H | -1.384 | -3.724 | -5.574 |
| H | 15.561 | -3.397  | 10.714 | H | 13.754 | 6.054  | 2.467  |
| H | 0.017  | -9.688  | 9.275  | H | 12.346 | 6.412  | 1.389  |
| H | -1.553 | -10.533 | 9.013  | H | 14.039 | 6.689  | 0.809  |
| H | -1.467 | -8.744  | 8.807  | H | -4.584 | -4.120 | -3.440 |
| H | 17.071 | -6.179  | 8.703  | H | -3.765 | -3.477 | -1.956 |
| H | 15.961 | -6.055  | 7.287  | H | -3.283 | -5.078 | -2.637 |
| H | 15.357 | -6.702  | 8.877  | H | 14.768 | 2.865  | 0.782  |
| H | -1.706 | -10.204 | 5.309  | H | 14.985 | 3.906  | 2.241  |
| H | -2.377 | -8.937  | 6.406  | H | 15.596 | 4.470  | 0.637  |
| H | -2.576 | -10.692 | 6.810  | H | -4.060 | -2.143 | -4.838 |
| H | 17.686 | -3.891  | 8.332  | H | -2.405 | -1.428 | -4.845 |
| H | 16.543 | -2.526  | 8.592  | H | -3.428 | -1.364 | -3.343 |
| H | 16.448 | -3.499  | 7.070  | H | 13.344 | 3.670  | -1.143 |
| H | 2.011  | -8.899  | 2.942  | H | 13.989 | 5.349  | -1.114 |
| H | 2.818  | -7.270  | 3.165  | H | 12.216 | 5.076  | -0.908 |
| H | 12.595 | -0.505  | 9.278  | H | 0.647  | 0.265  | -2.024 |
| H | 11.019 | -0.852  | 8.463  | H | 1.855  | -0.536 | -0.932 |
| H | -1.463 | -5.717  | -0.487 | H | 8.991  | 0.583  | 1.388  |
| H | 13.812 | 2.191   | 4.282  | H | 9.127  | 1.665  | -0.078 |
| H | -0.883 | -7.725  | 3.294  | N | 2.733  | -1.313 | 2.307  |
| H | 14.500 | -1.079  | 7.003  | C | 1.338  | -1.914 | 2.354  |
| H | -4.412 | -8.300  | 1.909  | C | 1.368  | -3.222 | 3.156  |
| H | -2.853 | -8.705  | 2.720  | C | -0.037 | -3.788 | 3.351  |
| H | -2.976 | -8.794  | 0.920  | H | 2.918  | -0.792 | 3.219  |
| H | 16.725 | 1.110   | 6.514  | H | 2.864  | -0.622 | 1.525  |
| H | 17.753 | 0.053   | 5.461  | H | 3.465  | -2.091 | 2.192  |
| H | 16.630 | -0.689  | 6.657  | H | 0.999  | -2.132 | 1.300  |
| H | -4.254 | -5.965  | 3.206  | H | 0.642  | -1.173 | 2.827  |
| H | -2.776 | -4.954  | 2.930  | H | 1.981  | -3.985 | 2.603  |
| H | -2.662 | -6.493  | 3.871  | H | 1.825  | -3.054 | 4.165  |
| H | 14.631 | -1.240  | 3.543  | H | -0.526 | -3.959 | 2.367  |
| H | 15.307 | -2.020  | 5.020  | H | -0.648 | -3.109 | 3.980  |
| H | 16.417 | -1.519  | 3.685  | H | 0.061  | -4.773 | 3.877  |
| H | -4.774 | -6.125  | 0.827  | N | 8.587  | -2.985 | 4.380  |
| H | -3.546 | -6.645  | -0.386 | C | 10.037 | -2.555 | 4.220  |
| H | -3.392 | -5.034  | 0.443  | C | 10.514 | -2.764 | 2.782  |
| H | 16.148 | 2.174   | 4.197  | C | 11.959 | -2.295 | 2.629  |
| H | 15.262 | 1.168   | 2.970  | H | 8.244  | -2.726 | 5.331  |
| H | 17.001 | 0.852   | 3.313  | H | 8.475  | -4.026 | 4.214  |
| H | 2.250  | -5.335  | -0.991 | H | 7.967  | -2.417 | 3.694  |
| H | 1.097  | -6.335  | -1.984 | H | 10.669 | -3.144 | 4.944  |
| H | 11.698 | 3.819   | 5.568  | H | 10.115 | -1.462 | 4.461  |
| H | 10.276 | 2.697   | 5.489  | H | 9.866  | -2.192 | 2.067  |
| H | 3.899  | -3.213  | 0.094  | H | 10.448 | -3.850 | 2.507  |
| H | 3.550  | -1.934  | -1.208 | H | 12.035 | -1.199 | 2.816  |
| H | 3.436  | -3.716  | -1.619 | H | 12.284 | -2.502 | 1.582  |
| H | 7.527  | 1.007   | 3.607  | H | 12.618 | -2.842 | 3.338  |
| H | 7.952  | 2.420   | 2.505  | C | 5.881  | -1.203 | 3.082  |
| H | 8.068  | 2.640   | 4.323  | C | 5.585  | -2.737 | 3.070  |
| H | -1.269 | -1.023  | -2.871 | O | 7.001  | -0.878 | 3.523  |
| H | 11.511 | 2.877   | -0.273 | O | 4.979  | -0.441 | 2.674  |
| H | -0.961 | -5.328  | -2.849 | O | 6.078  | -3.367 | 4.042  |
| H | 12.932 | 4.356   | 3.528  | O | 4.945  | -3.230 | 2.123  |
